# Supplementary material for: Blood Fatty Acid Status and Clinical Outcomes in Dialysis Patients: A Systematic Review
Source: MDPI journal article supplement (doi:10.3390/nu10101353), 2018-09-21
Supplement: s1 [file s1]

**Table S1:** Study selection based on inclusion criteria after reviewing full text.

| First author, year | Journal                                                | Title                                                                                                                                                                                     | Include? | Reason of Exclusion   |
|--------------------|--------------------------------------------------------|-------------------------------------------------------------------------------------------------------------------------------------------------------------------------------------------|----------|-----------------------|
| Ahmad, 1989        | Kidney International Supplement                        | Fatty acid abnormalities in hemodialysis patients: effect of L-carnitine administration.                                                                                                  | No       | Duplicate publication |
| An, 2009           | Journal of Renal Nutrition                             | Comparison of fatty acid contents of erythrocyte membrane in hemodialysis and peritoneal dialysis patients.                                                                               | Yes      |                       |
| An, 2011           | Clinical Nephrology                                    | Association of adiponectin and leptin with serum lipids and erythrocyte omega-3 and omega-6 fatty acids in dialysis patients.                                                             | Yes      |                       |
| An, 2012           | Nutrition Research                                     | Omega-3 fatty acid supplementation increases 1, 25-dihydroxyvitamin D and fetuin-A levels in dialysis patients.                                                                           | Yes      |                       |
| An, 2012           | Prostaglandins, Leukotrienes and Essential Fatty Acids | Effect of omega-3 fatty acids on the modification of erythrocyte membrane fatty acid content including oleic acid in peritoneal dialysis patients.                                        | Yes      |                       |
| Allawi, 2017       | Journal of Pharmaceutical Sciences and Research        | Effects of Omega-3 on Vitamin D Activation in Iraqi Patients with Chronic Kidney Disease Treated by Maintenance Hemodialysis.                                                             | No       | No FA data            |
| Asemi, 2016        | Molecular Nutrition & Food Research                    | Effect of the omega - 3 fatty acid plus vitamin E supplementation on subjective global assessment score, glucose metabolism, and lipid concentrations in chronic hemodialysis patients.   | No       | No FA data            |
| Asemi, 2016        | International Urology and Nephrology                   | Effects of omega-3 fatty acid plus alpha-tocopherol supplementation on malnutrition–inflammation score, biomarkers of inflammation and oxidative stress in chronic hemodialysis patients. | No       | No FA data            |
| Barden, 2015       | Journal of Hypertension                                | n-3 fatty acids reduce plasma 20-hydroxyeicosatetraenoic acid and blood pressure in patients with chronic kidney disease.                                                                 | No       | Non-dialysis          |
| Barden, 2016       | Nutrients                                              | n-3 fatty acid supplementation and leukocyte telomere length in patients with chronic kidney disease.                                                                                     | No       | Non-dialysis          |
| Bartel, 1982       | Metabolism-Clinical and Experimental                   | Effect of dialysis on serum carnitine, free fatty acids, and triglyceride levels in man and the rat.                                                                                      | No       | No FA data            |
| Beavers, 2008      | Nephrology                                             | Omega-3 fatty acid supplementation and total homocysteine levels in end - stage renal disease patients.                                                                                   | No       | No FA data            |
| Begum, 2004        | Journal of Renal Nutrition                             | Supplementation with n-3 and n-6 polyunsaturated fatty acids: effects on lipoxygenase activity and clinical symptoms of pruritus in hemodialysis patients.                                | Yes      |                       |
| Bowden, 2007       | Journal of Renal Nutrition                             | Effects of omega-3 fatty acid supplementation on vascular access thrombosis in polytetrafluorethylene grafts.                                                                             | No       | No FA data            |
| Bowden, 2009       | Journal of Renal Nutrition                             | Effects of omega-3 fatty acid supplementation on lipid levels in end stage renal disease patients.                                                                                        | No       | No FA data            |
| Bowden, 2009       | Nutrition in Clinical Practice                         | Fish oil supplementation lowers C - reactive protein levels independent of triglyceride reduction in patients with end - stage renal disease.                                             | No       | No FA data            |
| Cacciagiú, 2014    | Metabolic Syndrome and                                 | Do insulin resistance conditions further impair the lipid and inflammatory profile in end-                                                                                                | No       | No FA data            |

|                        |                                                        |                                                                                                                                                                                 |     |                   |
|------------------------|--------------------------------------------------------|---------------------------------------------------------------------------------------------------------------------------------------------------------------------------------|-----|-------------------|
|                        | Related Disorders                                      | stage renal disease patients on hemodialysis?                                                                                                                                   |     |                   |
| Chapkin, 1983          | Translational Research                                 | Characterization of the individual phospholipids and their fatty acids in serum and high-density lipoprotein of the renal patient on long-term maintenance hemodialysis.        | No  | No FA of interest |
| Dahwa, 2014            | Biomarkers                                             | Variability of oxidative stress biomarkers in hemodialysis patients.                                                                                                            | No  | No FA data        |
| Dasgupta, 1990         | Clinical Physiology and Biochemistry                   | Abnormal fatty acid profile in chronic hemodialysis patients: possible deficiency of essential fatty acids.                                                                     | Yes |                   |
| Dashti-Khavidaki, 2014 | American Journal of Therapeutics                       | Effects of omega-3 fatty acids on depression and quality of life in maintenance hemodialysis patients.                                                                          | No  | No FA data        |
| Daud, 2012             | Vascular Health and Risk Management                    | Effects of protein and omega-3 supplementation, provided during regular dialysis sessions, on nutritional and inflammatory indices in hemodialysis patients.                    | No  | No FA data        |
| Deger, 2016            | Clinical Journal of the American Society of Nephrology | High dose omega-3 fatty acid administration and skeletal muscle protein turnover in maintenance hemodialysis patients.                                                          | No  | No FA data        |
| Delarue, 2008          | British Journal of Nutrition                           | Fish oil attenuates adrenergic overactivity without altering glucose metabolism during an oral glucose load in haemodialysis patients.                                          | Yes |                   |
| Delmas-Beauvieux, 1995 | Nephron                                                | Evaluation of red blood cell lipoperoxidation in hemodialysed patients during erythropoietin therapy supplemented or not with iron.                                             | Yes |                   |
| Dessi, 2014            | Lipids in Health and Disease                           | Plasma and erythrocyte membrane phospholipids and fatty acids in Italian general population and hemodialysis patients.                                                          | Yes |                   |
| de Fijter, 1995        | Haematologica                                          | Does additional treatment with fish oil mitigate the side effects of recombinant human erythropoietin in dialysis patients?.                                                    | Yes |                   |
| de Gomez Dumm, 2001    | Medicina-Buenos Aires                                  | Lipid abnormalities in chronic renal failure patients undergoing hemodialysis.                                                                                                  | Yes |                   |
| de Mattos, 2017        | Journal of Renal Nutrition                             | Omega-3 fatty acid supplementation is associated with oxidative stress and dyslipidemia, but does not contribute to better lipid and oxidative status on hemodialysis patients. | Yes |                   |
| De Smet, 2001          | Clinical chemistry                                     | Heparin-induced release of protein-bound solutes during hemodialysis is an in vitro artifact.                                                                                   | No  | No FA of interest |
| Dhingra, 2016          | Environmental Research                                 | Perfluorooctanoic acid and chronic kidney disease: Longitudinal analysis of a Mid-Ohio Valley community.                                                                        | No  | Non-dialysis      |
| Dolegowska, 2007       | Renal Failure                                          | Effect of hemodialysis on the content of fatty acids in monolayers of erythrocyte membranes in patients with chronic renal failure.                                             | No  | No FA of interest |
| Eloot, 2013            | PLoS One                                               | Does the adequacy parameter kt/vurea reflect uremic toxin concentrations in hemodialysis patients?                                                                              | No  | No FA data        |
| Esaki, 2017            | Journal of Renal Nutrition                             | Effects of a novel nutritional formula enriched with eicosapentaenoic acid and docosahexaenoic acid specially developed for tube-fed hemodialysis patients.                     | Yes |                   |
| Friedman, 2006         | American Journal of Kidney Diseases                    | Fish consumption and omega-3 fatty acid status and determinants in long-term hemodialysis.                                                                                      | Yes |                   |

|                  |                                           |                                                                                                                                                                                     |     |                       |
|------------------|-------------------------------------------|-------------------------------------------------------------------------------------------------------------------------------------------------------------------------------------|-----|-----------------------|
| Friedman, 2008   | Journal of Renal Nutrition                | Feasibility study of erythrocyte long-chain omega-3 polyunsaturated fatty acid content and mortality risk in hemodialysis patients.                                                 | Yes |                       |
| Friedman, 2008   | Journal of Renal Nutrition                | Acute rise of omega-3 polyunsaturated fatty acids during hemodialysis treatment.                                                                                                    | No  | Duplicate publication |
| Friedman, 2012   | American Journal of Nephrology            | Low Blood Levels of Long-Chain n-3 Polyunsaturated Fatty Acids in US Hemodialysis Patients: Clinical Implications.                                                                  | Yes |                       |
| Friedman, 2013   | Kidney International                      | Inverse relationship between long-chain n-3 fatty acids and risk of sudden cardiac death in patients starting hemodialysis.                                                         | Yes |                       |
| Friedman, 2013   | American Journal of Nephrology            | Fatty acids and other risk factors for sudden cardiac death in patients starting hemodialysis.                                                                                      | Yes |                       |
| Friedman, 2016   | Nutrition Research                        | Association between plasma endocannabinoids and appetite in hemodialysis patients: A pilot study.                                                                                   | Yes |                       |
| Ghanei, 2012     | Iranian Red Crescent Medical Journal      | Efficacy of omega-3 fatty acids supplementation in treatment of uremic pruritus in hemodialysis patients: a double-blind randomized controlled trial.                               | No  | No FA data            |
| Gault, 1992      | Nephron                                   | Heparin, fatty acids and sodium, potassium-ATPase inhibition by plasma factors during hemodialysis.                                                                                 | No  | No FA of interest     |
| Gharekhani, 2014 | Journal of Renal Nutrition                | Effects of oral supplementation with omega-3 fatty acids on nutritional state and inflammatory markers in maintenance hemodialysis patients.                                        | No  | No FA data            |
| Gharekhani, 2014 | DARU Journal of Pharmaceutical Sciences   | Potential effects of omega-3 fatty acids on anemia and inflammatory markers in maintenance hemodialysis patients.                                                                   | No  | No FA data            |
| Gharekhani, 2014 | European Journal of Clinical Pharmacology | The effect of omega-3 fatty acids on depressive symptoms and inflammatory markers in maintenance hemodialysis patients: a randomized, placebo-controlled clinical trial.            | No  | No FA data            |
| Gillett, 2004    | Saudi Medical Journal                     | Plasma concentrations of non-esterified fatty acids in chronic renal failure in the United Arab Emirates.                                                                           | No  | No FA data            |
| Girelli, 1992    | Clinica Chimica Acta                      | Red blood cells and platelet membrane fatty acids in non-dialyzed and dialyzed uremies.                                                                                             | Yes |                       |
| Harving, 2015    | Clinical Nephrology                       | n-3 polyunsaturated fatty acids and adiponectin in patients with end-stage renal disease.                                                                                           | No  | Duplicate publication |
| Hamazaki, 1984   | Kidney International                      | Effects of fish oil rich in eicosapentaenoic acid on serum lipid in hyperlipidemic hemodialysis patients.                                                                           | Yes |                       |
| Hamazaki, 2009   | Clinical Nephrology                       | The relationship between n-3 long-chain polyunsaturated fatty acids and pulse wave velocity in diabetic and non-diabetic patients under long-term hemodialysis. A horizontal study. | No  | Duplicate publication |
| Hamazaki, 2011   | American journal of Nephrology            | Docosahexaenoic acid is an independent predictor of all-cause mortality in hemodialysis patients.                                                                                   | Yes |                       |
| Hashimoto, 1996  | Clinica Chimica Acta                      | Lipid abnormalities of erythrocyte membranes in hemodialysis patients with chronic renal failure.                                                                                   | No  | No FA data            |
| Holler, 199      | Peritoneal Dialysis International         | Eicosanoid precursors: potential factors for atherogenesis in diabetic CAPD patients?                                                                                               | Yes |                       |
| Horiuchi, 1987   | European Journal of Clinical              | Plasma free fatty acids and protein binding of disopyramide during haemodialysis.                                                                                                   | No  | No FA data            |

|                   |                                                        |                                                                                                                                                      |     |                       |
|-------------------|--------------------------------------------------------|------------------------------------------------------------------------------------------------------------------------------------------------------|-----|-----------------------|
|                   | Pharmacology                                           |                                                                                                                                                      |     |                       |
| Hsu, 2010         | Nephron Clinical Practice                              | N-acetylcysteine for the management of anemia and oxidative stress in hemodialysis patients.                                                         | No  | No FA data            |
| Huang, 2012       | Nephrology Dialysis Transplantation                    | Essential polyunsaturated fatty acids, inflammation and mortality in dialysis patients.                                                              | Yes |                       |
| Huang, 2013       | Journal of Internal Medicine                           | Clinical determinants and mortality predictability of stearyl-Co A desaturase-1 activity indices in dialysis patients.                               | Yes |                       |
| Ichimura, 2016    | Yakugaku Zasshi                                        | Correlations between Plasma Levels of Anionic Uremic Toxins and Clinical Parameters in Hemodialysis Patients                                         | No  | No FA data            |
| Irish, 2017       | JAMA Internal Medicine                                 | Effect of fish oil supplementation and aspirin use on arteriovenous fistula failure in patients requiring hemodialysis: a randomized clinical trial. | No  | No FA data            |
| Kajbaf, 2016      | Journal of Research in Pharmacy Practice               | Does Omega-3 supplementation decrease carotid intima-media thickening in hemodialysis patients?.                                                     | No  | No FA data            |
| Khosroshahi, 2013 | Iranian Journal of Kidney Diseases                     | Effect of omega-3 supplementation on serum level of homocysteine in hemodialysis patients.                                                           | No  | No FA data            |
| Kim, 2004         | Prostaglandins, Leukotrienes and Essential Fatty Acids | Alteration of plasma total F2-isoprostanes before and after hemodialysis in end-stage renal disease patients.                                        | No  | No FA of interest     |
| Kim, 2013         | Iranian Journal of Kidney Diseases                     | Comparison of fetuin-A, vitamin D, monounsaturated fatty acid, and vascular calcification on plain radiography between dialysis modalities.          | Yes |                       |
| Kirkegaard, 2012  | British Journal of Nutrition                           | Marine n-3 fatty acids, atrial fibrillation and QT interval in haemodialysis patients.                                                               | No  | Duplicate publication |
| Koorts, 2002      | Prostaglandins, Leukotrienes and Essential Fatty Acids | Red blood cell fatty acid profile of chronic renal failure patients receiving maintenance haemodialysis treatment.                                   | Yes |                       |
| Kooshki, 2011     | Annals of Nutrition and Metabolism                     | Effects of marine omega-3 fatty acids on serum systemic and vascular inflammation markers and oxidative stress in hemodialysis patients.             | No  | No FA data            |
| Kooshki, 2011     | Renal Failure                                          | Effects of omega-3 fatty acids on serum lipids, lipoprotein (a), and hematologic factors in hemodialysis patients.                                   | No  | No FA data            |
| Kuwamura, 2018    | Journal of Renal Nutrition                             | Altered Serum n-6 Polyunsaturated Fatty Acid Profile and Risks of Mortality and Cardiovascular Events in a Cohort of Hemodialysis Patients.          | No  | Duplicate publication |
| Lee, 2015         | International Journal of Endocrinology                 | Effect of omega-3 fatty acid on the fatty acid content of the erythrocyte membrane and proteinuria in patients with diabetic nephropathy.            | No  | Non-dialysis          |
| Lee, 2015         | Marine Drugs                                           | The effects of omega-3 Fatty Acid on vitamin d activation in hemodialysis patients: a pilot study.                                                   | Yes |                       |
| Lucchi, 1993      | Nephron                                                | Conjugated diene fatty acids in patients with chronic renal failure: evidence of increased lipid peroxidation?                                       | No  | No FA of interest     |
| Lucchi, 2000      | Kidney international                                   | Changes in conjugated linoleic acid and its metabolites in patients with chronic renal failure.                                                      | No  | No FA of interest     |
| Lucchi, 2005      | Artificial Organs                                      | Changes in conjugated linoleic acid and palmitoleic acid are correlated to retinol levels in                                                         | No  | No FA of interest     |

|                  |                                                |                                                                                                                                                                                                   |     |                       |
|------------------|------------------------------------------------|---------------------------------------------------------------------------------------------------------------------------------------------------------------------------------------------------|-----|-----------------------|
|                  |                                                | chronic renal failure in both hemodialysis and conservative treatment patients.                                                                                                                   |     |                       |
| Madsen, 2010     | Journal of Parenteral and Enteral Nutrition    | Effect of Intravenous $\omega$ -3 Fatty Acid Infusion and Hemodialysis on Fatty Acid Composition of Free Fatty Acids and Phospholipids in Patients With End-Stage Renal Disease.                  | No  | Duplicate publication |
| Madsen, 2011     | Journal of Renal Nutrition                     | Marine n-3 polyunsaturated fatty acids in patients with end-stage renal failure and in subjects without kidney disease: a comparative study.                                                      | Yes |                       |
| Maher, 1998      | Nephrology Dialysis Transplantation            | Neutropenia and plasma free radical reaction products during haemodialysis.                                                                                                                       | No  | No FA of interest     |
| Marangoni, 1992  | Artificial Organs                              | Plasma lipids and fatty acid levels in chronically uremic patients undergoing blood purification with different methods.                                                                          | Yes |                       |
| Mas, 2016        | Clinical Nutrition                             | A randomized controlled trial of the effects of n-3 fatty acids on resolvins in chronic kidney disease.                                                                                           | No  | Non-dialysis          |
| Maeda, 1989      | Nephron                                        | Effects of L-carnitine administration on short-chain fatty acid (acetic acid) and long-chain fatty acid metabolism during hemodialysis.                                                           | No  | No FA data            |
| Mingardi, 1988   | The International Journal of Artificial Organs | Factors affecting plasma free fatty acids rise during hemodialysis.                                                                                                                               | No  | No FA data            |
| Mirfatahi, 2016  | Iranian Journal of Kidney Diseases             | Effects of flaxseed oil on serum lipids and lipoproteins in hemodialysis patients: a randomized controlled trial.                                                                                 | No  | No FA data            |
| Moeinzadeh, 2016 | Iranian Journal of Kidney Diseases             | Effects of omega-3 fatty acid supplementation on serum biomarkers, inflammatory agents, and quality of life of patients on hemodialysis.                                                          | No  | No FA data            |
| Naini, 2015      | Journal of Research in Pharmacy Practice       | Effect of Omega-3 fatty acids on blood pressure and serum lipids in continuous ambulatory peritoneal dialysis patients.                                                                           | No  | No FA data            |
| Nakata, 2015     | European Journal of Echocardiography           | Sudden death prediction by C-reactive protein, electrocardiographic findings, and myocardial fatty acid uptake in haemodialysis patients: analysis of a multicentre prospective cohort sub-study. | No  | No FA data            |
| Nakamura, 2008   | Clinical and Experimental Hypertension         | Renoprotective effect of telmisartan in patients with chronic kidney disease.                                                                                                                     | No  | Non-dialysis          |
| Nakamura, 2008   | In Vivo                                        | Serum lipid profile and plasma fatty acid composition in hemodialysis patients-comparison with chronic kidney disease patients.                                                                   | Yes |                       |
| Nishimura, 2014  | Nephron Clinical Practice                      | Clinical potential of oral nicorandil to improve myocardial fatty acid metabolism after percutaneous coronary intervention in hemodialysis patients.                                              | No  | No FA data            |
| Oh, 2012         | Transplantation Proceedings                    | Comparison of erythrocyte membrane fatty acid contents in renal transplant recipients and dialysis patients. In                                                                                   | Yes |                       |
| Pazda, 2017      | Biomedical Chromatography                      | Suitability of selected chromatographic columns for analysis of fatty acids in dialyzed patients.                                                                                                 | Yes |                       |
| Peck, 1996       | The American Journal of Clinical Nutrition     | Effect of three sources of long-chain fatty acids on the plasma fatty acid profile, plasma prostaglandin E2 concentrations, and pruritus symptoms in hemodialysis patients.                       | Yes |                       |

|                         |                                                 |                                                                                                                                                             |     |                       |
|-------------------------|-------------------------------------------------|-------------------------------------------------------------------------------------------------------------------------------------------------------------|-----|-----------------------|
| Perunicic-Pekovic, 2007 | Nephrology                                      | Effect of n - 3 fatty acids on nutritional status and inflammatory markers in haemodialysis patients.,                                                      | Yes |                       |
| Peuchant, 1988          | Clinica Chimica Acta                            | Increase of erythrocyte resistance to hemolysis and modification of membrane lipids induced by hemodialysis.                                                | Yes |                       |
| Peuchant, 1994          | Free Radical Biology and Medicine               | Lipoperoxidation in plasma and red blood cells of patients undergoing haemodialysis: vitamins A, E, and iron status.                                        | Yes |                       |
| Poulia, 2011            | Journal of Renal Nutrition                      | Omega-3 fatty acids supplementation does not affect serum lipids in chronic hemodialysis patients.                                                          | No  | No FA data            |
| Puchades, 2013          | Clinical Nephrology                             | Study of oxidative stress in patients with advanced renal disease and undergoing either hemodialysis or peritoneal dialysis.                                | No  | No FA data            |
| Rasmussen, 2010         | Nutrition Research                              | The content of docosahexaenoic acid in serum phospholipid is inversely correlated with plasma homocysteine levels in patients with end-stage renal disease. | No  | Duplicate publication |
| Ristić, 2006            | Renal Failure                                   | Plasma and erythrocyte phospholipid fatty acids composition in Serbian hemodialyzed patients.                                                               | Yes |                       |
| Ristic-Medic, 2014      | The Scientific World Journal                    | Effects of dietary milled seed mixture on fatty acid status and inflammatory markers in patients on hemodialysis.                                           | Yes |                       |
| Rivara, 2015            | Journal of Renal Nutrition                      | A pilot randomized crossover trial assessing the safety and short-term effects of pomegranate supplementation in hemodialysis patients.                     | No  | No FA data            |
| Rivara, 2015            | BMC Nephrology                                  | Association of plasma F2-isoprostanes and isofurans concentrations with erythropoiesis-stimulating agent resistance in maintenance hemodialysis patients.   | No  | No FA data            |
| Roob, 2001              | Kidney International                            | Ex vivo low-density lipoprotein oxidizability and in vivo lipid peroxidation in patients on CAPD.                                                           | No  | No FA of interest     |
| Rroji, 2016             | Journal of Nephrology                           | Association of advanced age with concentrations of uraemic toxins in CKD.                                                                                   | No  | No FA data            |
| Saifullah, 2007         | Nephrology Dialysis Transplantation             | Oral fish oil supplementation raises blood omega-3 levels and lowers C-reactive protein in haemodialysis patients—a pilot study.                            | No  | Duplicate publication |
| Sagara, 2016            | Cardiovascular Diabetology                      | Impact of teneligliptin on oxidative stress and endothelial function in type 2 diabetes patients with chronic kidney disease: a case-control study.         | No  | Non-dialysis          |
| Salahudeen, 2001        | Kidney International                            | Increase in plasma esterified F2-isoprostanes following intravenous iron infusion in patients on hemodialysis.                                              | No  | No FA data            |
| Sasagawa, 1998          | Journal of Nutritional Science and Vitaminology | The significance of plasma lysophospholipids in patients with renal failure on hemodialysis.                                                                | No  | No FA of interest     |
| Scheppach, 1988         | Clinical Nephrology                             | Effects of acetate during regular hemodialysis.                                                                                                             | No  | No FA data            |
| Sertoglu, 2014          | Chemistry and Physics of Lipids                 | Comparison of plasma and erythrocyte membrane fatty acid compositions in patients with end-stage renal disease and type 2 diabetes mellitus.                | Yes |                       |
| Shearer, 2012           | Journal of Renal Nutrition                      | Plasma fatty acids in chronic kidney disease: nervonic acid predicts mortality.                                                                             | No  | Non-dialysis          |
| Shoji, 2013             | American Journal of Kidney Diseases             | Serum n-3 and n-6 polyunsaturated fatty acid profile as an independent predictor of cardiovascular events in hemodialysis patients.                         | Yes |                       |

|                           |                                                        |                                                                                                                                                                            |     |                       |
|---------------------------|--------------------------------------------------------|----------------------------------------------------------------------------------------------------------------------------------------------------------------------------|-----|-----------------------|
| Sikorska-Wiśniewska, 2017 | Renal failure                                          | Disorders of serum omega-3 fatty acid composition in dialyzed patients, and their associations with fat mass.                                                              | Yes |                       |
| Sørensen, 2015            | Journal of Renal Nutrition                             | The effect of n-3 fatty acids on small dense low-density lipoproteins in patients with end-stage renal disease: a randomized placebo-controlled intervention study.        | No  | Duplicate publication |
| Son, 2012                 | Journal of Renal Nutrition                             | Association between vascular calcification scores on plain radiographs and fatty acid contents of erythrocyte membrane in hemodialysis patients.                           | Yes |                       |
| Suchitra, 2011            | Saudi Journal of Kidney Diseases and Transplantation   | The effect of L-carnitine supplementation on lipid parameters, inflammatory and nutritional markers in maintenance hemodialysis patients.                                  | No  | No FA data            |
| Svensson, 2006            | Clinical journal of the American Society of Nephrology | N-3 fatty acids as secondary prevention against cardiovascular events in patients who undergo chronic hemodialysis: a randomized, placebo-controlled intervention trial.   | Yes |                       |
| Svensson, 2008            | Nephrology Dialysis Transplantation                    | The effect of n-3 fatty acids on lipids and lipoproteins in patients treated with chronic haemodialysis: a randomized placebo-controlled intervention study.               | No  | Duplicate publication |
| Szklarek-Kubicka, 2009    | Journal of Renal Nutrition                             | Effect of intradialytic intravenous administration of $\omega$ -3 fatty acids on nutritional status and inflammatory response in hemodialysis patients: a pilot study.     | No  | No FA data            |
| Taccone-Gallucci, 1986    | American Journal of Nephrology                         | Red blood cell membrane lipid peroxidation in continuous ambulatory peritoneal dialysis patients.                                                                          | No  | No FA data            |
| Taccone-Gallucci, 1989    | The International Journal of Artificial Organs         | Lack of oxidative damage in serum polyunsaturated fatty acids before and after dialysis in chronic uremic patients.                                                        | Yes |                       |
| Takamura, 1997            | Clinical Chemistry                                     | Effects of uremic toxins and fatty acids on serum protein binding of furosemide: possible mechanism of the binding defect in uremia.                                       | No  | No FA data            |
| Talwalker, 1980           | The Journal of Clinical Endocrinology & Metabolism     | Different mechanisms for the increased enzymatic activity of renin in plasma of patients with chronic renal failure and patients receiving glucocorticoid therapy.         | Yes |                       |
| Terashima, 2014           | Hemodialysis International                             | Inverse association between docosahexaenoic acid and mortality in patients on hemodialysis during over 10 years.                                                           | Yes |                       |
| Tikanoja, 1989            | Clinica Chimica Acta                                   | Association between increased concentrations of free thyroxine and unsaturated free fatty acids in non-thyroidal illnesses: role of albumin.                               | No  | Duplicate publication |
| Tsujimoto, 2013           | Toxins                                                 | Effects of decreased vitamin D and accumulated uremic toxin on human CYP3A4 activity in patients with end-stage renal disease.                                             | No  | No FA data            |
| Tsuzuki, 2000             | Clinica Chimica Acta                                   | Analysis of 7-ketocholesterol in low density lipoprotein and fatty acid composition in erythrocyte membranes of patients on maintenance hemodialysis and healthy controls. | Yes |                       |
| Umemoto, 2016             | Atherosclerosis                                        | Reverse association of omega-3/omega-6 polyunsaturated fatty acids ratios with carotid atherosclerosis in patients on hemodialysis.                                        | Yes |                       |
| Varga, 1997               | Nephron                                                | Relative abundance of some free fatty acids in plasma of uremic patients: Relationship between fatty acids, lipid parameters, and diseases.                                | No  | No FA of interest     |
| Viecelli, 2016            | Nephrology                                             | Baseline characteristics of the omega - 3 fatty acids (Fish oils) and Aspirin in Vascular access Outcomes in Renal Disease (FAVORED) study.                                | No  | No FA data            |

|                        |                                          |                                                                                                                                                                                                     |     |                       |
|------------------------|------------------------------------------|-----------------------------------------------------------------------------------------------------------------------------------------------------------------------------------------------------|-----|-----------------------|
| Wang, 2016             | Journal of Proteome Research             | Plasma lipidomics investigation of hemodialysis effects by using liquid chromatography–mass spectrometry.                                                                                           | No  | No FA data            |
| Watkins, 2016          | The Journal of Nutritional Biochemistry  | Serum phospholipid fraction of polyunsaturated fatty acids is the preferred indicator for nutrition and health status in hemodialysis patients.                                                     | No  | Duplicate publication |
| Wessel-Aas, 1984       | Acta Medica Scandinavica                 | Hemodialysis and cell toxicity in vitro related to plasma triglycerides, post - heparin lipolytic activity and free fatty acids.                                                                    | No  | No FA of interest     |
| Wessel-Aas, 1984       | Acta Medica Scandinavica                 | The effect of systemic heparinization on plasma lipoproteins and toxicity in patients on hemodialysis and continuous ambulatory peritoneal dialysis.                                                | No  | No FA of interest     |
| Westhuyzen, 2003       | Annals of Clinical & Laboratory Science  | Oxidative stress and erythrocyte integrity in end-stage renal failure patients hemodialysed using a vitamin E-modified membrane.                                                                    | Yes |                       |
| Wong, 2016             | Nutrition                                | Ratio of dietary $\omega$ -3 and $\omega$ -6 fatty acids—independent determinants of muscle mass—in hemodialysis patients with diabetes.                                                            | No  | No FA data            |
| Yamamoto, 2015         | Scientific Reports                       | Continuous reduction of protein-bound uraemic toxins with improved oxidative stress by using the oral charcoal adsorbent AST-120 in haemodialysis patients.                                         | No  | No FA data            |
| Yerlikaya, 2011        | Renal Failure                            | Plasma fatty acid composition in continuous ambulatory peritoneal dialysis patients: an increased omega-6/omega-3 ratio and deficiency of essential fatty acids.                                    | Yes |                       |
| Yoshimoto-Furuie, 1999 | Nephron                                  | Effects of oral supplementation with evening primrose oil for six weeks on plasma essential fatty acids and uremic skin symptoms in hemodialysis patients.                                          | Yes |                       |
| Zabel, 2010            | Journal of Renal Nutrition               | Adherence to fish oil intervention in patients with chronic kidney disease.                                                                                                                         | No  | Duplicate publication |
| Zabel, 2010            | Journal of Human Nutrition and Dietetics | , R., Ash, S., King, N., Naslund, E., & Bauer, J. (2010). Gender differences in the effect of fish oil on appetite, inflammation and nutritional status in haemodialysis patients.                  | Yes |                       |
| Zakaria, 2017          | International Urology and Nephrology     | The impact of fish oil and wheat germ oil combination on mineral-bone and inflammatory markers in maintenance hemodialysis patients: a randomized, double-blind, placebo-controlled clinical trial. | No  | No FA data            |

Abbreviation: FA, fatty acid.

**Table S2:** Quality assessment of studies reporting clinical endpoints.

| Study               | Q1  | Q2         | Q3  | Q4  | Q5 (a) | Q5 (b) | Q6 (a) | Q6 (b) | Q9         | Q10        | Q11 | Q12        |
|---------------------|-----|------------|-----|-----|--------|--------|--------|--------|------------|------------|-----|------------|
| Friedman, 2008 [26] | Yes | Can't tell | Yes | Yes | Yes    | Yes    | Yes    | Yes    | Can't tell | Can't tell | No  | Can't tell |
| Hamazaki, 2011 [45] | Yes | No         | Yes | Yes | Yes    | Yes    | Yes    | Yes    | Yes        | Can't tell | Yes | Yes        |
| Huang, 2012 [47]    | Yes | Yes        | Yes | Yes | Yes    | Yes    | Yes    | Yes    | Can't tell | Yes        | No  | Can't tell |
| Friedman, 2013 [23] | Yes | Yes        | Yes | Yes | Yes    | Yes    | Yes    | Yes    | Can't tell | Yes        | Yes | Yes        |



|                      |     |     |     |     |     |     |     |     |     |            |     |     |
|----------------------|-----|-----|-----|-----|-----|-----|-----|-----|-----|------------|-----|-----|
| Friedman, 2013 [24]  | Yes | Yes | Yes | Yes | Yes | Yes | Yes | Yes | Yes | Yes        | Yes | Yes |
| Shoji, 2013 [63]     | Yes | Yes | Yes | Yes | Yes | Yes | Yes | Yes | Yes | Yes        | Yes | Yes |
| Terashima, 2014 [25] | Yes | No  | Yes | Yes | Yes | Yes | Yes | Yes | Yes | Can't tell | Yes | Yes |

Footnote: Question 7 and 8 are open-ended questions and excluded from the quality assessment.

Abbreviation: Q, question.

**Table S3.** Comparison of FA status of dialysis patients to healthy controls based on dialysis vintage.

|                   | Total serum/plasma                       |                                       | PL                |                                       | Erythrocyte                                                  |                                             |
|-------------------|------------------------------------------|---------------------------------------|-------------------|---------------------------------------|--------------------------------------------------------------|---------------------------------------------|
|                   | DV <72 months                            | DV ≥72 months                         | DV <72 months     | DV ≥72 months                         | DV <72 months                                                | DV ≥72 months                               |
| SFA               |                                          |                                       |                   |                                       |                                                              |                                             |
| 14:0              |                                          | ↔ <sup>[18,59]</sup>                  |                   |                                       | ↔ <sup>[49,54]</sup> , ↓ <sup>[28]</sup>                     | ↔ <sup>[58]</sup>                           |
| 16:0              | ↑ <sup>[34]</sup>                        | ↔ <sup>[18,59]</sup>                  |                   | ↔ <sup>[60]</sup>                     | ↔ <sup>[28,49,54]</sup> ,                                    | ↔ <sup>[58,60]</sup>                        |
| 18:0              | ↔ <sup>[34]</sup>                        | ↔ <sup>[18]</sup> , ↓ <sup>[59]</sup> |                   | ↔ <sup>[60]</sup>                     | ↔ <sup>[28,49]</sup> , ↓ <sup>[54]</sup>                     | ↔ <sup>[58,60]</sup>                        |
| Total SFA         |                                          |                                       |                   | ↔ <sup>[60]</sup>                     | ↔ <sup>[28,49]</sup> , ↓ <sup>[54]</sup>                     | ↔ <sup>[60]</sup> , ↑ <sup>[69]</sup>       |
| MUFA              |                                          |                                       |                   |                                       |                                                              |                                             |
| 16:1 $n$ -7       | ↑ <sup>[34]</sup>                        | ↔ <sup>[18]</sup>                     |                   | ↔ <sup>[60]</sup>                     | ↔ <sup>[49,54]</sup> , ↓ <sup>[28]</sup>                     | ↑ <sup>[60]</sup>                           |
| 18:1 $n$ -9       | ↑ <sup>[34,64]</sup>                     | ↑ <sup>[18,59]</sup>                  |                   | ↑ <sup>[60]</sup>                     | ↑ <sup>[28,49,54]</sup>                                      | ↔ <sup>[58,60]</sup>                        |
| Total MUFA        |                                          |                                       |                   | ↑ <sup>[60]</sup>                     | ↑ <sup>[49,54]</sup> , ↓ <sup>[28]</sup>                     | ↔ <sup>[69]</sup>                           |
| $n$ -6 PUFA       |                                          |                                       |                   |                                       |                                                              |                                             |
| 18:2 $n$ -6       |                                          | ↓ <sup>[18,59]</sup>                  | ↓ <sup>[38]</sup> | ↔ <sup>[42,60]</sup>                  | ↓ <sup>[38,49]</sup> , ↑ <sup>[28,54]</sup>                  | ↓ <sup>[69]</sup> , ↔ <sup>[58,60]</sup>    |
| 20:4 $n$ -6       | ↓ <sup>[34,64]</sup> , ↑ <sup>[51]</sup> | ↓ <sup>[18,59]</sup>                  | ↓ <sup>[38]</sup> | ↔ <sup>[60]</sup> , ↑ <sup>[42]</sup> | ↔ <sup>[49,54]</sup> , ↑ <sup>[28]</sup> , ↓ <sup>[38]</sup> | ↔ <sup>[58,60]</sup> , ↑ <sup>[29]</sup>    |
| 22:4 $n$ -6       | ↓ <sup>[34]</sup>                        | ↔ <sup>[59]</sup>                     |                   | ↔ <sup>[60]</sup>                     | ↔ <sup>[49]</sup> , ↓ <sup>[28]</sup>                        | ↔ <sup>[58,60]</sup> , ↓ <sup>[69]</sup>    |
| Total $n$ -6 PUFA |                                          |                                       |                   | ↓ <sup>[60]</sup>                     | ↑ <sup>[28,54]</sup> , ↓ <sup>[49]</sup> ,                   | ↑ <sup>[29]</sup> , ↓ <sup>[60]</sup>       |
| $n$ -3 PUFA       |                                          |                                       |                   |                                       |                                                              |                                             |
| 18:3 $n$ -3       | ↓ <sup>[64]</sup>                        | ↔ <sup>[18]</sup>                     | ↔ <sup>[38]</sup> |                                       | ↓ <sup>[28,38]</sup> , ↔ <sup>[49]</sup> , ↑ <sup>[54]</sup> | ↓ <sup>[29]</sup>                           |
| 20:5 $n$ -3       | ↓ <sup>[34,51,64]</sup>                  |                                       | ↓ <sup>[38]</sup> | ↓ <sup>[42,60]</sup>                  | ↔ <sup>[28,38]</sup> , ↓ <sup>[49,54]</sup>                  | ↔ <sup>[29,58]</sup> , ↓ <sup>[60]</sup>    |
| 22:5 $n$ -3       | ↓ <sup>[34]</sup>                        | ↔ <sup>[18,59]</sup>                  |                   | ↔ <sup>[60]</sup>                     | ↔ <sup>[28,49,54]</sup> ,                                    | ↔ <sup>[29,60]</sup> , ↓ <sup>[69]</sup>    |
| 22:6 $n$ -3       | ↓ <sup>[34,51,64]</sup>                  | ↔ <sup>[18,59]</sup>                  | ↓ <sup>[38]</sup> | ↓ <sup>[60]</sup> , ↔ <sup>[42]</sup> | ↓ <sup>[38,54]</sup> , ↔ <sup>[28,49]</sup>                  | ↓ <sup>[58,60]</sup> , ↔ <sup>[29,69]</sup> |
| $n$ -3 Index      |                                          |                                       | ↔ <sup>[38]</sup> |                                       | ↔ <sup>[28,38]</sup> , ↓ <sup>[54]</sup>                     |                                             |
| Total $n$ -3 PUFA | ↓ <sup>[64]</sup>                        |                                       |                   | ↓ <sup>[60]</sup>                     | ↔ <sup>[28,49]</sup> , ↓ <sup>[54]</sup>                     | ↔ <sup>[29]</sup> , ↓ <sup>[60]</sup>       |
| PUFA              |                                          |                                       |                   |                                       |                                                              |                                             |
| Total PUFA        |                                          |                                       |                   |                                       | ↓ <sup>[49]</sup> , ↑ <sup>[28]</sup> , ↔ <sup>[54]</sup>    | ↓ <sup>[69]</sup>                           |
| $n$ -6/ $n$ -3    |                                          |                                       |                   | ↔ <sup>[60]</sup>                     | ↔ <sup>[28,49]</sup> , ↑ <sup>[54]</sup>                     | ↔ <sup>[60]</sup>                           |

↑, significantly higher; ↓, significantly lower; ↔, not significantly different. Abbreviation: CE, cholesteryl ester; DV, dialysis vintage; MUFA, monounsaturated fatty acid;  $n$ -3 PUFA, omega-3 polyunsaturated fatty acid;  $n$ -6 PUFA, omega-6 polyunsaturated fatty acid; PL, phospholipid; PUFA, polyunsaturated fatty acid; SFA, saturated fatty acid; TAG, triacylglycerol. Fatty acid abbreviation: 14:0, myristic acid; 16:0, palmitic acid; 16:1 $n$ -7, palmitoleic acid; 18:0, stearic acid; 18:1 $n$ -9, oleic acid; 18:2 $n$ -6, linoleic acid; 18:3 $n$ -3,  $\alpha$ -linolenic acid; 20:4 $n$ -6, arachidonic acid; 20:5 $n$ -3, eicosapentaenoic acid; 22:4 $n$ -6, adrenic acid; 22:5 $n$ -3, docosapentaenoic acid; 22:6 $n$ -3, docosahexaenoic acid.
